# Supplementary material for: Comprehensive genomic profiling of upper tract urothelial carcinoma and urothelial carcinoma of the bladder identifies distinct molecular characterizations with potential implications for targeted therapy & immunotherapy
Source: PubMed Central journal article supplement (PMC9936149; doi:10.3389/fimmu.2022.1097730), 2023-02-03

# A: UTUC

Level ■ Actionable ■ NA

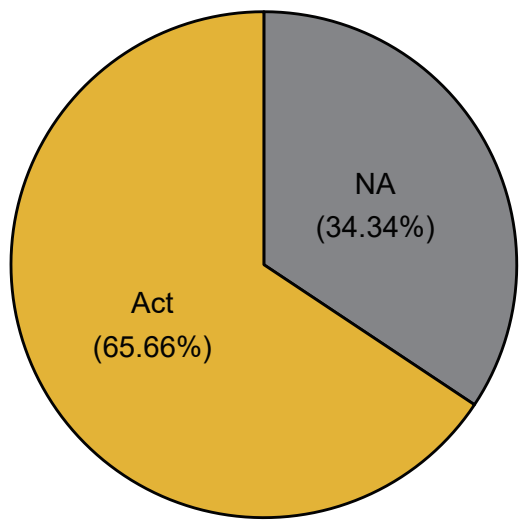

Level ■ Level 1 ■ Level 3B ■ Level 4

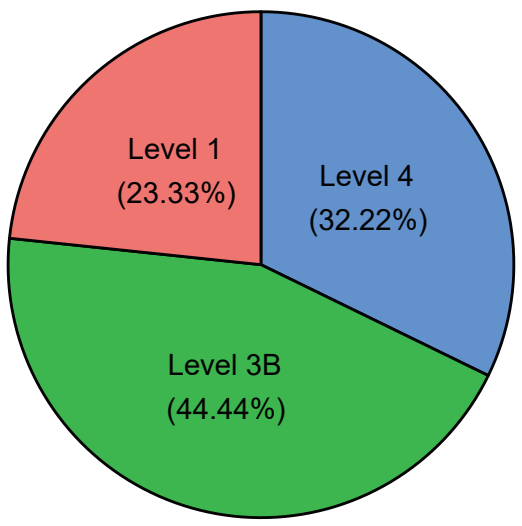

# B: UCB

Level ■ Actionable ■ NA

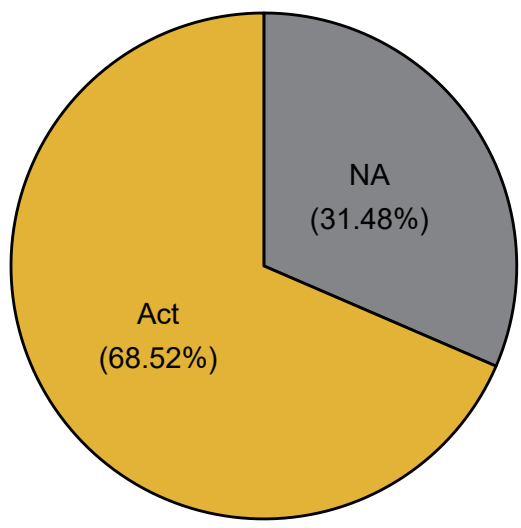

Level ■ Level 1 ■ Level 3B ■ Level 4

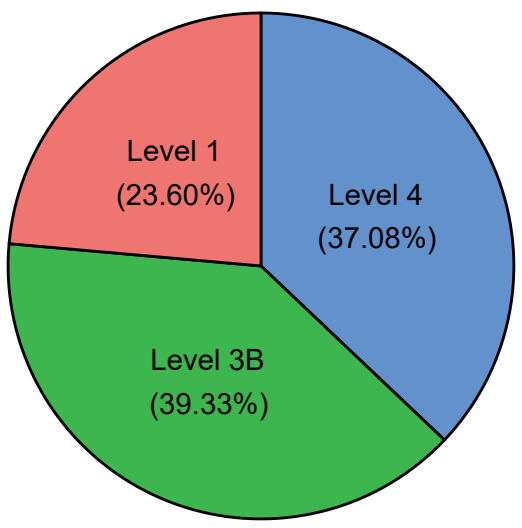

Supplement: Image_1.pdf [file Image_1.pdf]
