# Supplementary material for: Comprehensive genomic profiling of upper tract urothelial carcinoma and urothelial carcinoma of the bladder identifies distinct molecular characterizations with potential implications for targeted therapy & immunotherapy
Source: PubMed Central journal article supplement (PMC9936149; doi:10.3389/fimmu.2022.1097730), 2023-02-03

UCB\_tcgga UCB\_local

20%  
10%  
0%  
10%  
20%

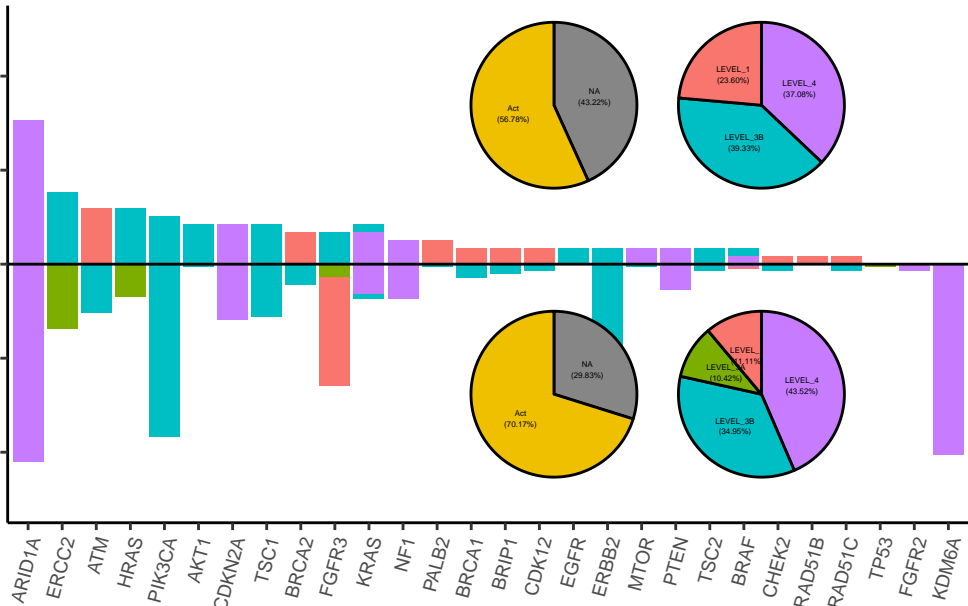

HIGHEST\_LEVEL

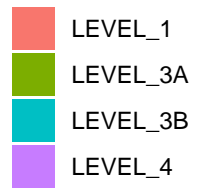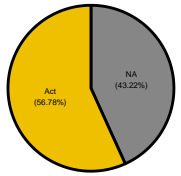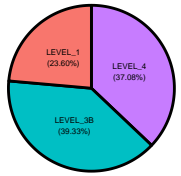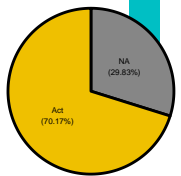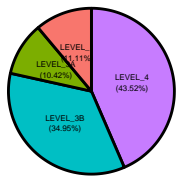

Supplement: Image_2.pdf [file Image_2.pdf]
