# Supplementary material for: Comprehensive genomic profiling of upper tract urothelial carcinoma and urothelial carcinoma of the bladder identifies distinct molecular characterizations with potential implications for targeted therapy & immunotherapy
Source: PubMed Central journal article supplement (PMC9936149; doi:10.3389/fimmu.2022.1097730), 2023-02-03

UCB\_MSK UCB\_local

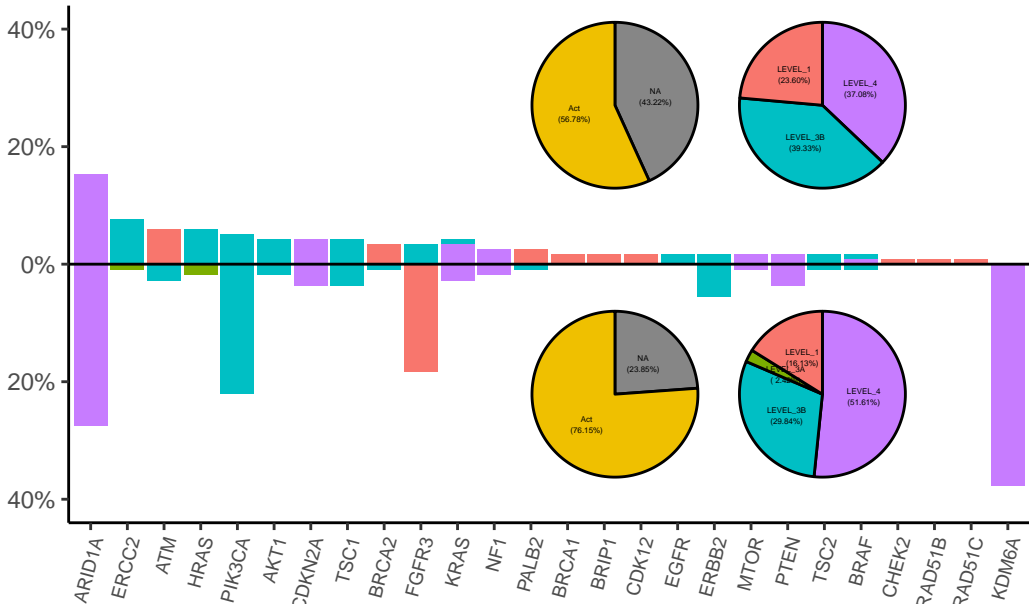

Hugo\_Symbol

HIGHEST\_LEVEL

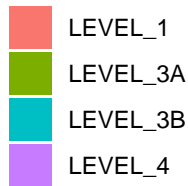

Supplement: Image_3.pdf [file Image_3.pdf]
