# Supplementary material for: Comprehensive genomic profiling of upper tract urothelial carcinoma and urothelial carcinoma of the bladder identifies distinct molecular characterizations with potential implications for targeted therapy & immunotherapy
Source: PubMed Central journal article supplement (PMC9936149; doi:10.3389/fimmu.2022.1097730), 2023-02-03

**A****UTUC:I/II**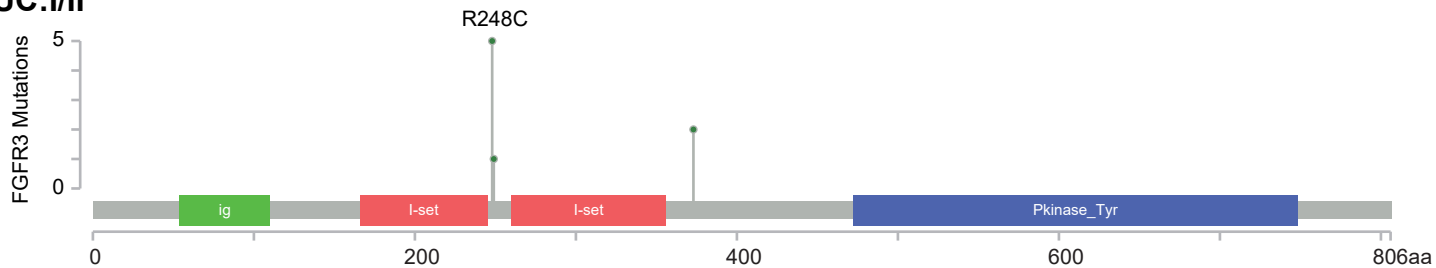**UCB:I/II**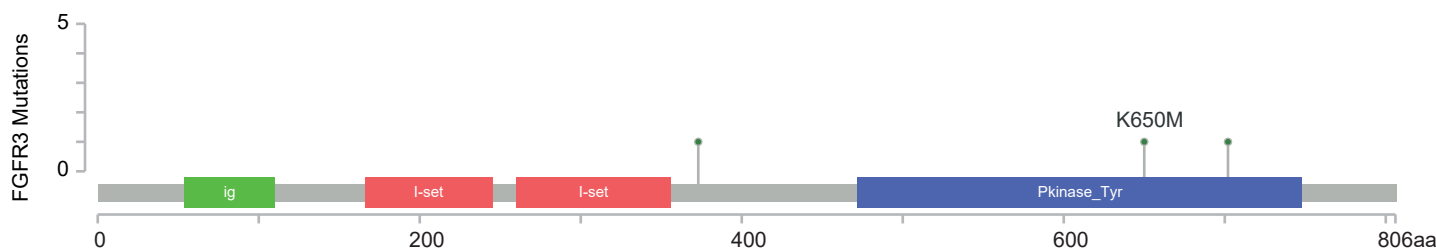**B****UTUC:III/IV**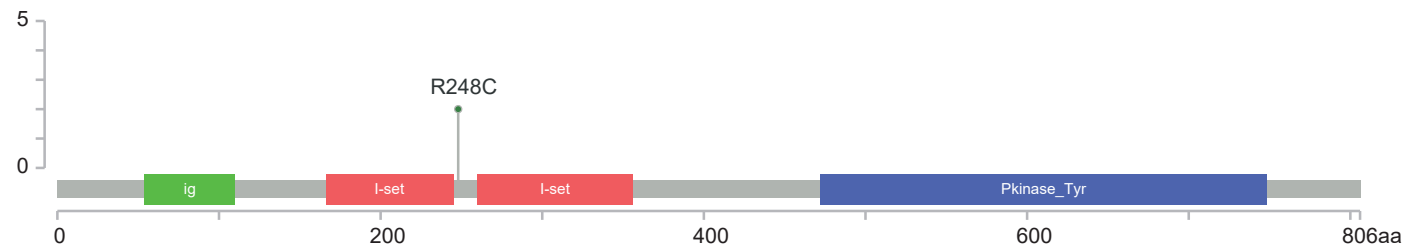**UCB:III/IV**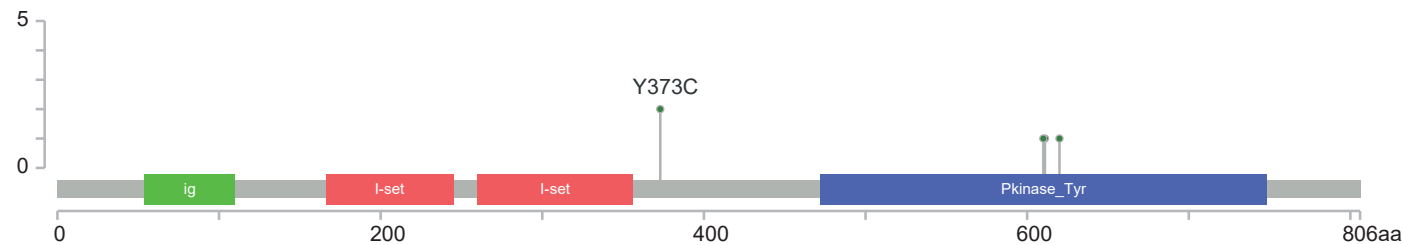

Supplement: Image_5.pdf [file Image_5.pdf]
